# Supplementary material for: Using Remote Sensing to Monitor the Spring Phenology of Acadia National Park across Elevational Gradients
Source: Copernicus journal article supplement (doi:10.5194/bg-2019-126), 2019-05-20
Supplement: Supplementary file 1 [file bg-2019-126-supplement.pdf]

## Supplementary material

**Table S1. Satellite data used for the phenological monitoring of Acadia National Park**

| Source  | Variable            | Temporal resolution | Spatial grid resolution | Available dates                                                   |
|---------|---------------------|---------------------|-------------------------|-------------------------------------------------------------------|
| MODIS   | NBAR                | Daily               | 500m                    | Mar. 2000-present (V006)                                          |
| VIIRS   | NBAR                | Daily               | 500m                    | Jan. 2012-present (Offline)                                       |
| Landsat | Surface Reflectance | 16 day repeat cycle | 30m                     | Jul. 1999-present for Landsat7<br>Apr. 2013-present for Landsat 8 |

**Table S2. Number of pixels over the hiking trails**

| Hiking trails                  | No. of 500 m sinusoidal grids | No. of 30 m UTM grids |
|--------------------------------|-------------------------------|-----------------------|
| Cadillac Ridge                 | 27                            | 352                   |
| Pemetic Ridge                  | 13                            | 154                   |
| Sargent Ridge<br>+ Giant Slide | 24                            | 322                   |
| Total                          | 64                            | 828                   |

5

**Table S3. Common species monitored on the hiking trails.**

| Scientific Name                 | Common Name              | Acronym |
|---------------------------------|--------------------------|---------|
| <i>Gaylussacia bacata</i>       | Huckleberry              | GaBa    |
| <i>Kalmia angustifolia</i>      | Sheep's laurel           | KaAn    |
| <i>Maianthemum canadense</i>    | Canada mayflower         | MaCa    |
| <i>Rhododendron canadense</i>   | Rhodora                  | RhCa    |
| <i>Sibbaldiopsis tridentate</i> | Three-toothed cinquefoil | SiTr    |
| <i>Vaccinium angustifolium</i>  | Low bush blueberry       | VaAn    |
| <i>Vaccinium vitis-idaea</i>    | Mountain cranberry       | VaVi    |

**Table S4. Landsat pixels and common species in each elevation zone.**

| Ridge    | Aspect | Zone(foot) | Pixels.n | Percentage (%) | Common species               |
|----------|--------|------------|----------|----------------|------------------------------|
| Cadillac | North  | 0-600      | 11       | 47.83          | VaAn                         |
|          |        | 600-900    | 30       | 51.72          | VaAn                         |
|          |        | 900-1200   | 30       | 100.00         | VaAn                         |
|          |        | 1200-      | 32       | 100.00         | VaAn                         |
|          | South  | 1200-      | 44       | 89.80          | KaAn, SiTr, VaAn             |
|          |        | 900-1200   | 60       | 100.00         | GaBa, KaAn, SiTr, VaAn       |
|          |        | 600-900    | 28       | 77.78          | GaBa, KaAn, SiTr, VaAn       |
|          |        | 0-600      | 4        | 6.25           | VaAn                         |
| Pemetic  | North  | 0-600      | 6        | 25.00          |                              |
|          |        | 600-900    |          |                |                              |
|          |        | 900-1200   | 2        | 6.25           | KaAn, VaAn                   |
|          |        | 1200-      | 6        | 85.71          | RhCa, SiTr, VaAn             |
|          | South  | 1200-      | 10       | 100.00         | RhCa, VaVi                   |
|          |        | 900-1200   | 22       | 62.86          | KaAn, VaAn                   |
|          |        | 600-900    | 3        | 14.29          |                              |
|          |        | 0-600      |          |                |                              |
| Sargent  | North  | 0-600      | 8        | 10.26          | KaAn, MaCa, VaAn             |
|          |        | 600-900    |          |                | KaAn, MaCa, VaAn             |
|          |        | 900-1200   | 9        | 42.86          | KaAn, MaCa, VaAn             |
|          |        | 1200-      | 16       | 94.12          | MaCa, RhCa, VaAn, VaVi       |
|          | South  | 1200-      | 35       | 100.00         | KaAn, MaCa, RhCa, SiTr, VaAn |
|          |        | 900-1200   | 5        | 9.62           | VaAn, KaAn                   |
|          |        | 600-900    | 9        | 13.43          | GaBa, KaAn, MaCa, RhCa, VaAn |
|          |        | 0-600      | 4        | 14.81          | MaCa, VaAn                   |

5 Pixels.n indicates the number of Landsat pixels in each zone that are used for the community greenup date calculation, where developed area and evergreen forest pixels are not included. Percentage indicates the percentage of Landsat pixels used for community comparison as compared to all the Landsat pixels in each elevational zone. Blanks indicate no common species or no Landsat pixel used for the community comparison.
